# Supplementary material for: Nucleated red blood cells, critical illness survivors and postdischarge outcomes: a cohort study
Source: Springer Nature journal article supplement (doi:10.1186/s13054-017-1724-z), 2017-06-17
Supplement: MOESM1 [file 12458424]

**Additional file 1: Clinical and demographic characteristics of the parent cohort (n=22,694)**

|                                     | no.(%)<br>without<br>NRBC | no.(%) with<br>NRBC | Total              | P-value          |
|-------------------------------------|---------------------------|---------------------|--------------------|------------------|
| <i>N</i>                            | <b>19,816</b>             | <b>2,878</b>        | <b>22,694</b>      |                  |
| <i>Male Gender-no.(%)</i>           | <b>11,475 (58)</b>        | <b>1,568 (55)</b>   | <b>13,043 (57)</b> | <b>0.001</b>     |
| <i>Non-White Race-no.(%)</i>        | <b>4,056 (20)</b>         | <b>601 (21)</b>     | <b>4,657 (21)</b>  | <b>0.60</b>      |
| <i>Age years-mean±SD</i>            | <b>62.0 ± 18.9</b>        | <b>61.4±18.0</b>    | <b>62.0±18.8</b>   | <b>0.093</b>     |
| <i>Surgical Patient Type-no.(%)</i> | <b>8,155 (41)</b>         | <b>1,239 (43)</b>   | <b>9,394 (41)</b>  | <b>0.051</b>     |
| <i>Deyo-Charlson Index-no.(%)</i>   |                           |                     |                    | <b>&lt;0.001</b> |
| 0                                   | <b>3305 (17)</b>          | <b>562 (20)</b>     | <b>3,867 (17)</b>  |                  |
| 1-2                                 | <b>5258 (27)</b>          | <b>682 (24)</b>     | <b>5,940 (26)</b>  |                  |
| 3-6                                 | <b>5181 (26)</b>          | <b>635 (22)</b>     | <b>5,816 (26)</b>  |                  |
| ≥ 7                                 | <b>6073 (31)</b>          | <b>999 (35)</b>     | <b>7,071 (31)</b>  |                  |
| <i>Sepsis-no.(%)</i>                | <b>3,339 (17)</b>         | <b>354 (12)</b>     | <b>3,693 (16)</b>  | <b>&lt;0.001</b> |
| <i>Pneumonia-no.(%)</i>             | <b>5,605 (28)</b>         | <b>593 (21)</b>     | <b>6,198 (27)</b>  | <b>&lt;0.001</b> |
| <i>Acute organ failure-no.(%)</i>   |                           |                     |                    | <b>&lt;0.001</b> |
| 0                                   | <b>4,077 (21)</b>         | <b>848 (29)</b>     | <b>4,925 (22)</b>  |                  |
| 1                                   | <b>5,654 (29)</b>         | <b>960 (33)</b>     | <b>6,613 (29)</b>  |                  |
| 2                                   | <b>4,561 (23)</b>         | <b>581 (20)</b>     | <b>5,142 (23)</b>  |                  |
| ≥ 3                                 | <b>5,525 (28)</b>         | <b>489 (17)</b>     | <b>6,014 (27)</b>  |                  |
| <i>Mortality Rates %</i>            |                           |                     |                    |                  |
| In-hospital                         | <b>2,599 (13)</b>         | <b>309 (11)</b>     | <b>2,908 (13)</b>  | <b>&lt;0.001</b> |
| 30-day                              | <b>2,846 (14)</b>         | <b>392 (14)</b>     | <b>3,238 (14)</b>  | <b>0.29</b>      |
| 90-day                              | <b>3,617 (18)</b>         | <b>509 (18)</b>     | <b>4,126 (18)</b>  | <b>0.47</b>      |

Data presented as n (%) unless otherwise indicated. P values determined by chi-square unless designated by (\*) then P value determined by ANOVA.
